# Supplementary material for: Ion–ion and ion–solvent interactions in lithium imidazolide electrolytes studied by Raman spectroscopy and DFT models
Source: Royal Society of Chemistry journal article supplement (doi:10.1039/c1cp20063a), 2011-01-01
Supplement: c1cp20063a.pdf [file c1cp20063a.pdf]

Electronic Supplementary Information:

**Ion-ion and ion-solvent interactions in lithium imidazolid electrolytes studied by Raman spectroscopy and DFT models**

**Johan Scheers,<sup>\*a</sup> Leszek Niedzicki,<sup>b,c</sup> Grażyna Z. Żukowska,<sup>b,c</sup> Patrik Johansson,<sup>a,c</sup>  
Władysław Wiczorek<sup>b,c</sup> and Per Jacobsson<sup>a</sup>**

<sup>a</sup>*Department of Applied Physics, Chalmers University of Technology,  
SE-412 96 Gothenburg, Sweden.*

<sup>b</sup>*Polymer Ionics Research Group, Faculty of Chemistry, Warsaw University of Technology,  
Noakowskiego 3, PL-00664 Warsaw, Poland.*

<sup>c</sup>*ALISTORE-European Research Institute*

<sup>\*</sup>Corresponding author. Tel.: +46 31 772 3177; fax: +46 31 772 2090.

E-mail address: johan.scheers@chalmers.se

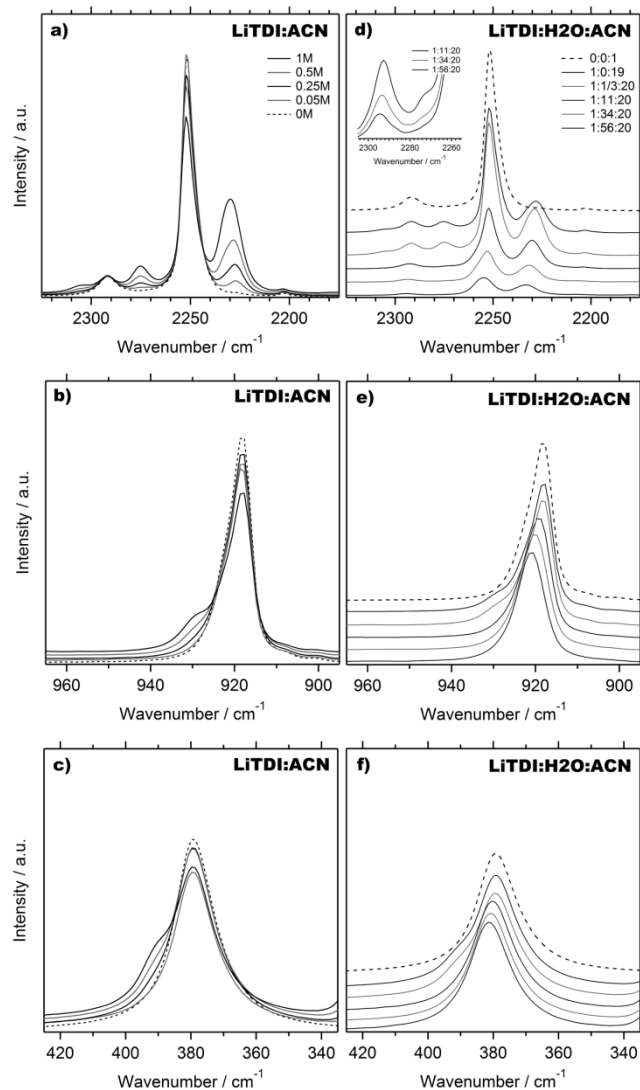

**Figure S1.** Raman spectra showing  $\text{Li}^+$  coordination effects on the vibration modes of ACN; in LiTDI:ACN only (a, b, and c) and in the presence of water (d, e, f).

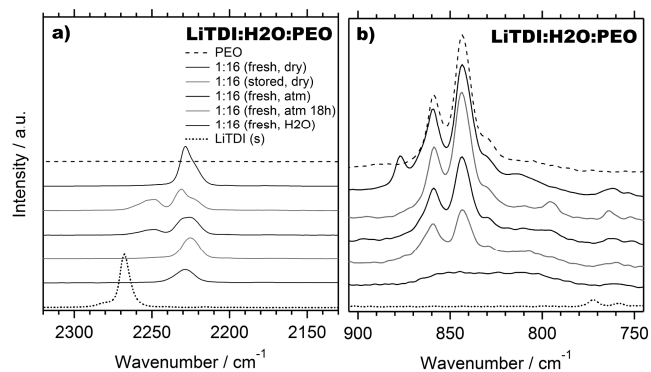

**Figure S2.** Raman spectra showing the effect of water on a) the  $\nu(\text{C3-N2})$  modes and b) the polymer backbone in PEO-based electrolytes.

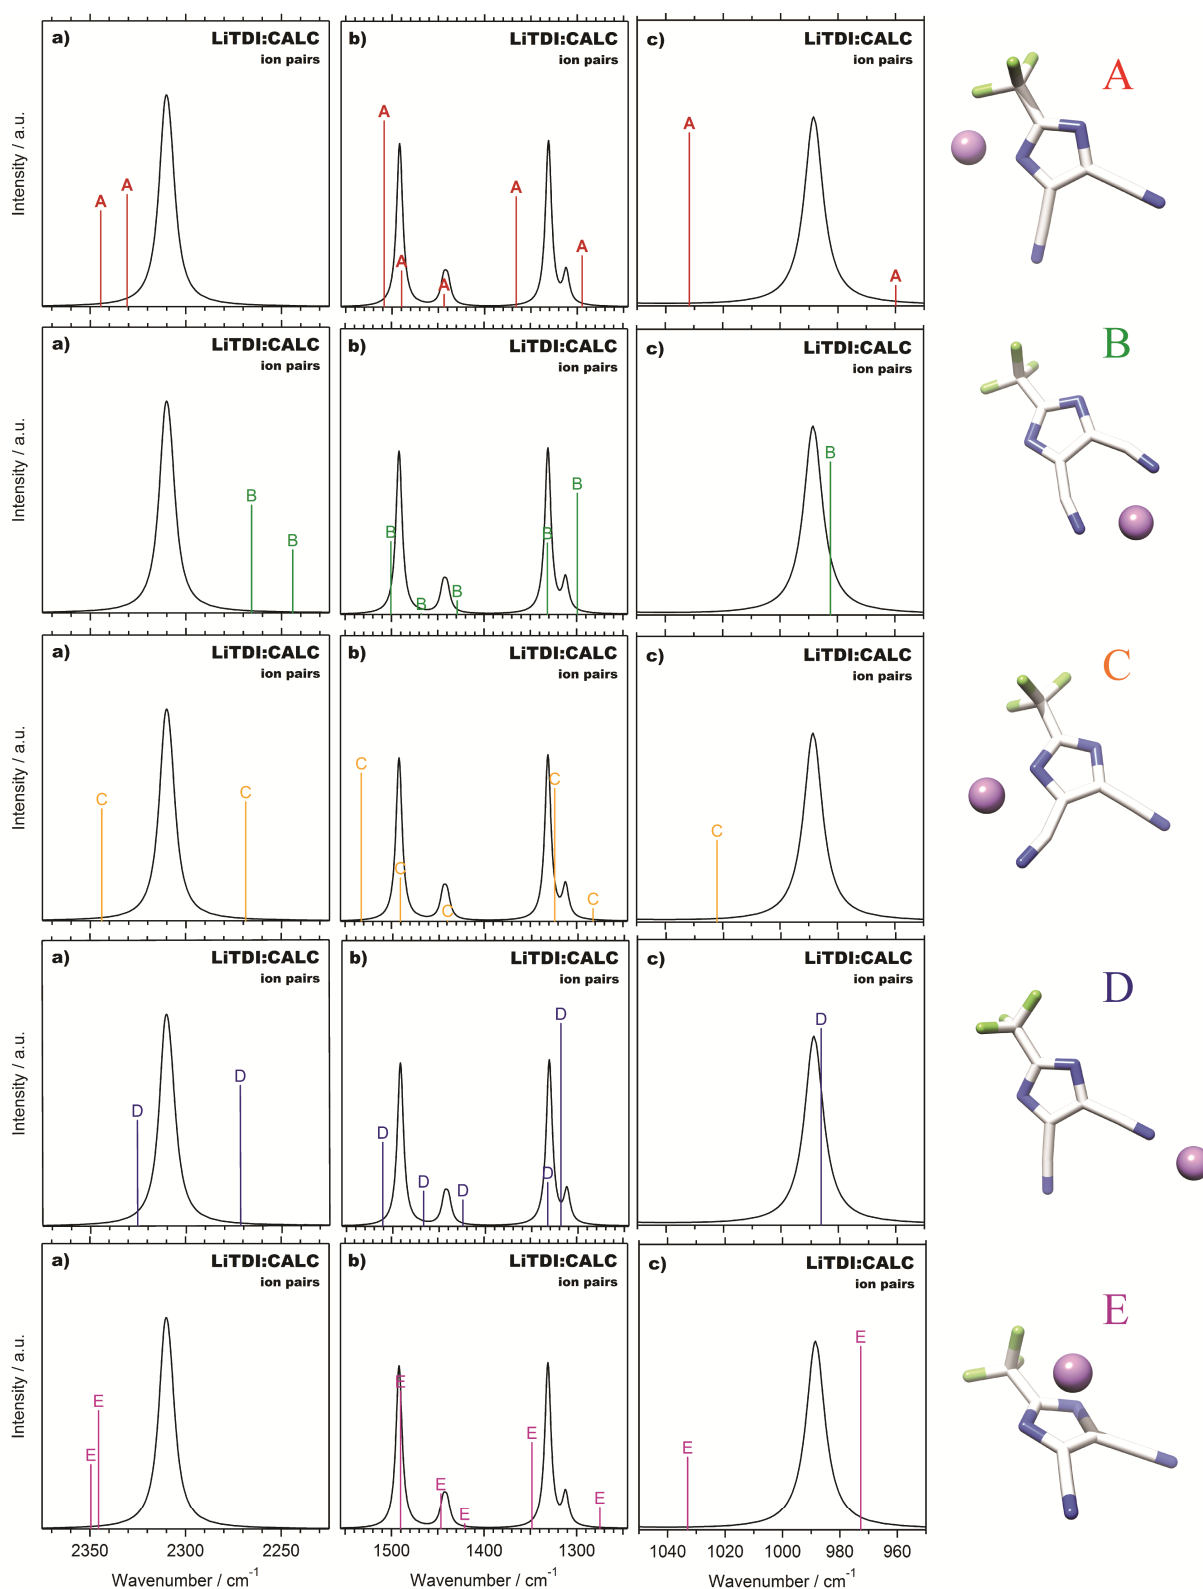

**Figure S3.** Calculated Raman spectra of the vibrational shifts resulting from different LiTDI ion pair configurations (vertical lines) in comparison with TDI (envelopes) in three different regions; a-c) (vacuum, B3LYP/6-311+G(d)).

**Table S1.** Assigned vibrational spectrum of TDI, based on the calculated energy minimum structure in vacuum. Experimental data are given for a 1M LiTDI:H<sub>2</sub>O electrolyte (wavenumbers and qualitative band features).

| Mode | $\nu_{\text{exp}}$<br>/cm <sup>-1</sup> | $I_{\text{exp}}$<br>/a.u. | $\nu_{\text{calc}}$<br>/cm <sup>-1</sup> | $IR_{\text{Int}}$<br>/km·mol <sup>-1</sup> | $R_{\text{Act}}$<br>/Å <sup>4</sup> ·amu <sup>-1</sup> | Tentative assignment                                                       |
|------|-----------------------------------------|---------------------------|------------------------------------------|--------------------------------------------|--------------------------------------------------------|----------------------------------------------------------------------------|
| 33   | 2238                                    | s                         | 2311                                     | 136                                        | 565                                                    | $\nu_s(\text{C3-N2})$                                                      |
| 32   |                                         |                           | 2308                                     | 159                                        | 378                                                    | $\nu_{\text{as}}(\text{C3-N2})$                                            |
| 31   | 1499                                    | s                         | 1492                                     | 63                                         | 149                                                    | $\nu(\text{C4-C1}; \text{C2-C2}^*)_{\text{o.o.ph.}}$                       |
| 30   | 1460                                    | m                         | 1444                                     | 61                                         | 21                                                     | $\nu(\text{C1-N1}; \text{C2}^*-\text{C3}^*)_{\text{i.ph.}}$                |
| 29   |                                         |                           | 1440                                     | 82                                         | 19                                                     | $\nu(\text{C1-N1}^*; \text{C2-C3})_{\text{i.ph.}}$                         |
| 28   | 1317                                    | s                         | 1331                                     | 44                                         | 124                                                    | $\nu_{\text{as}}(\text{N1-C2})$                                            |
| 27   |                                         |                           | 1312                                     | 35                                         | 24                                                     | $\nu_s(\text{N1-C2})$                                                      |
| 26   | 1187                                    | w,br                      | 1189                                     | 297                                        | 6                                                      | $[\nu(\text{C4-C1})_{\text{o.o.ph.}}; \nu_s(\text{C1-N1})]_{\text{i.ph.}}$ |
| 25   | 1136                                    | w,br                      | 1171                                     | 45                                         | 4                                                      | $\nu_{\text{as}}(\text{N1-C2}); \nu(\text{C4-C1})$                         |
| 24   |                                         |                           | 1118                                     | 322                                        | 14                                                     | $\delta(\text{C4})$                                                        |
| 23   |                                         |                           | 1073                                     | 314                                        | 3                                                      | $\pi(\text{C4})$                                                           |
| 22   | 996                                     | m                         | 988                                      | 92                                         | 16                                                     | $\delta(\text{N1-C1-N1}^*)$                                                |
| 21   | 765                                     | w,br                      | 757                                      | 7                                          | < 1                                                    | $\pi(\text{C1})$                                                           |
| 20   | 757                                     | w,sh                      | 755                                      | 2                                          | 1                                                      | $\delta(\text{CF}_3)$                                                      |
| 19   | 708                                     | w,br                      | 715                                      | < 1                                        | 2                                                      | $\pi(\text{C2}; \text{C2}^*)_{\text{o.o.ph.}}$                             |
| 18   |                                         |                           | 684                                      | 5                                          | 1                                                      | $\delta_{\text{as}}(\text{C2-C3-N2})$                                      |
| 17   | 679                                     | m                         | 677                                      | 7                                          | 10                                                     | $\delta(\text{CF}_3); \nu_s(\text{C2-C3})$                                 |
| 16   |                                         |                           | 586                                      | 4                                          | < 1                                                    | $\nu_{\text{as}}(\text{C2-C3})$                                            |
| 15   | 566                                     | vw                        | 580                                      | 2                                          | 2                                                      | $\pi_s(\text{C2}; \text{C3})_{\text{o.o.ph.}}$                             |
| 14   |                                         |                           | 540                                      | 5                                          | 2                                                      | $\pi_s(\text{C3})$                                                         |
| 13   | 525                                     | w                         | 522                                      | < 1                                        | 2                                                      | $\delta(\text{F2-C4-F2}^*); \nu_{\text{as}}(\text{C2-C3})$                 |
| 12   | 482                                     | w                         | 506                                      | 4                                          | 5                                                      | $\delta_s(\text{C2-C3-N2})$                                                |
| 11   | 466                                     | w                         | 497                                      | < 1                                        | 2                                                      | $\pi_{\text{as}}(\text{C3})$                                               |
| 10   |                                         |                           | 391                                      | 3                                          | < 1                                                    | $\pi(\text{NCN}^*)$                                                        |
| 9    | 392                                     | w                         | 391                                      | 2                                          | 2                                                      | $\delta(\text{F1-C4-C1}; \text{F2-C4-F2}^*)_{\text{i.ph.}}$                |
| 8    | 334                                     | m                         | 330                                      | 2                                          | 5                                                      | $\nu(\text{C4-C1})$                                                        |
| 7    |                                         |                           | 250                                      | 4                                          | < 1                                                    | $\delta(\text{F1-C4-C1})$                                                  |
| 6    |                                         |                           | 209                                      | 5                                          | < 1                                                    | $\pi(\text{C2C2}^*)_{\text{i.ph.}}$                                        |
| 5    |                                         |                           | 151                                      | < 1                                        | < 1                                                    | $\pi(\text{C2C2}^*)_{\text{o.o.ph.}}$                                      |
| 4    |                                         |                           | 124                                      | 1                                          | < 1                                                    | $\delta(\text{C4-C1-N1}^*)$                                                |
| 3    |                                         |                           | 111                                      | 2                                          | 9                                                      | $\delta_s(\text{C2}^*-\text{C2-C3})$                                       |
| 2    |                                         |                           | 88                                       | 2                                          | 4                                                      | $\pi(\text{CF}_3)$                                                         |
| 1    |                                         |                           | -8                                       | < 1                                        | 1                                                      | $(\text{CF}_3)_{\text{rotation}}$                                          |

br = broad; s = strong; sh = shoulder; w = weak; vw = very weak;  $\nu$  = stretching ( $\nu_s$  -symmetric;  $\nu_{\text{as}}$  -asymmetric);  $\delta$  = in plane bending or motion of atoms;  $\pi$  = out of plane bending or motion of a single atom/group of atoms; i.ph. = in phase; o.o.ph. = out of phase.

**Table S2.** Selected geometry parameters and normal modes for model structures.

| Model                                                                            | d(Li-N)<br>/Å | d(Li-F)<br>/Å | ∠(Li-N1-C2) | Δv <sub>1</sub> <sup>a</sup><br>/cm <sup>-1</sup> | Δv <sub>2</sub> <sup>b</sup><br>/cm <sup>-1</sup> | Δv <sub>3</sub> <sup>c</sup><br>/cm <sup>-1</sup> |
|----------------------------------------------------------------------------------|---------------|---------------|-------------|---------------------------------------------------|---------------------------------------------------|---------------------------------------------------|
| <b>Ion pairs:</b>                                                                |               |               |             |                                                   |                                                   |                                                   |
| LiTDI ( <i>A</i> )                                                               | 1.878         | 1.924         | 145.5       | +17                                               | +35                                               | +43                                               |
| LiTDI(ACN) <sub>1</sub> ( <i>F</i> )                                             | 1.923         | 2.049         | 141.3       | +16                                               | +27                                               | +53                                               |
| LiTDI(ACN) <sub>2</sub> ( <i>G</i> )                                             | 2.004         | 2.648         | 130.2       | +14                                               | +16                                               | +20                                               |
| LiTDI(ACN) <sub>3</sub> ( <i>H</i> )                                             | 2.074         | 2.908         | 129.1       | +9                                                | +14                                               | +12                                               |
| LiTDI(H <sub>2</sub> O) <sub>1</sub> ( <i>I</i> )                                | 1.908         | 2.132         | 137.5       | +24                                               | +23                                               | +57                                               |
| LiTDI(H <sub>2</sub> O) <sub>2</sub> ( <i>J</i> )                                | 1.988         | 3.281         | 122.1       | +24                                               | +13                                               | +16                                               |
| LiTDI(H <sub>2</sub> O) <sub>3</sub> ( <i>K</i> )                                | 2.054         | 3.286         | 124.5       | +19                                               | +16                                               | +12                                               |
| LiTDI <sub>ACN</sub> ( <i>L</i> ) <sup>d</sup>                                   | 2.059/2.075   | 2.980/2.946   | 127.1/122.9 | +5/+7                                             | +7/+9                                             | +15/+16                                           |
| LiTDI <sub>H<sub>2</sub>O</sub> ( <i>M</i> ) <sup>d</sup>                        | 2.064/2.082   | 2.988/2.953   | 127.2/122.8 | +5/+8                                             | +7/+9                                             | +15/+15                                           |
| [LiTDI(H <sub>2</sub> O) <sub>3</sub> ] <sub>ACN</sub> ( <i>N</i> ) <sup>d</sup> | 2.135/2.120   | 3.230/3.342   | 126.2/126.1 | +3/+6                                             | +5/+7                                             | +13/+13                                           |
| <b>Multiplets:</b>                                                               |               |               |             |                                                   |                                                   |                                                   |
| Li <sub>2</sub> TDI ( <i>O1</i> )                                                | 1.947/2.009   | 1.987/4.207   | 142.6/99.0  | +9/+67                                            | +21                                               | +15/+82                                           |
| Li <sub>2</sub> TDI ( <i>O2</i> )                                                | 1.946         | 1.902         | 147.6       | +17                                               | +6/+26                                            | -17/+38                                           |
| Li(TDI) <sub>2</sub> ( <i>P</i> )                                                | 1.977/1.978   | 2.140/2.150   | 140.9/141.4 | +13                                               | +24                                               | +15/+18                                           |
| Li <sub>2</sub> TDI <sub>2</sub> ( <i>Q</i> )                                    | 1.941/1.956   | 2.047/2.047   | 142.1/142.1 | +17                                               | +18                                               | +5/+58                                            |
| Li <sub>2</sub> TDI(ACN) <sub>6</sub> ( <i>R1</i> )                              | 2.097         | 2.868         | 130.2       | +13                                               | +5                                                | +14                                               |
| Li <sub>2</sub> TDI(ACN) <sub>5</sub> ( <i>R2</i> )                              | 2.086/2.167   | 2.924         | 128.8       | +10                                               | -1                                                | +12                                               |
| LiTDI <sub>2</sub> (ACN) <sub>2</sub> ( <i>S</i> )                               | 2.138/2.144   | 2.509/2.678   | 132.0/135.4 | +7                                                | +22                                               | +11                                               |
| Li <sub>2</sub> TDI <sub>2</sub> (ACN) <sub>4</sub> ( <i>T</i> )                 | 2.078/        | 2.132         | 137.5       | +11                                               | +5                                                | +15                                               |
| Li <sub>2</sub> TDI(H <sub>2</sub> O) <sub>6</sub> ( <i>U1</i> )                 | 2.091/2.095   | 2.884/3.362   | 125.2/122.4 | +35                                               | +19                                               | +31                                               |
| Li <sub>2</sub> TDI(H <sub>2</sub> O) <sub>6</sub> ( <i>U2</i> )                 | 2.077/2.001   | 3.220         | 125.6       | +20                                               | +5                                                | +14                                               |
| LiTDI <sub>2</sub> (H <sub>2</sub> O) <sub>2</sub> ( <i>V</i> )                  | 2.096/2.114   | 3.196/3.309   | 125.5/126.0 | +7/+12                                            | +10/+21                                           | -2/+6                                             |
| Li <sub>2</sub> TDI <sub>2</sub> (H <sub>2</sub> O) <sub>4</sub> ( <i>W</i> )    | 2.032/2.055   | 2.691/2.692   | 130.1/130.2 | +12                                               | +10                                               | +16                                               |
| [Li <sub>2</sub> TDI] <sub>ACN</sub> ( <i>X1</i> )                               | 2.081/2.112   | 2.629/3.265   | 131.2/131.4 | +13                                               | +21                                               | +31                                               |
| [Li <sub>2</sub> TDI] <sub>ACN</sub> ( <i>X2</i> )                               | 2.092         | 2.932         | 123.6       | +6                                                | +8                                                | +16                                               |
| [Li(TDI) <sub>2</sub> ] <sub>ACN</sub> ( <i>Y</i> )                              | 2.089/2.089   | 3.116/3.116   | 126.8/126.8 | +6                                                | +8                                                | +16                                               |
| [Li <sub>2</sub> TDI <sub>2</sub> ] <sub>ACN</sub> ( <i>Z</i> )                  | 2.112/2.113   | 2.901/2.902   | 123.3/123.3 | +8                                                | +4                                                | +17                                               |
| <b>Experimental:</b>                                                             |               |               |             |                                                   |                                                   |                                                   |
| 1M LiTDI/ACN                                                                     |               |               |             | +4                                                | +8                                                | +13/+24                                           |

<sup>a</sup> ν(C4-C1;C2-C2\*); <sup>b</sup> ν<sub>as</sub>(N1-C2); <sup>c</sup> δ(N1-C1-N1\*); <sup>d</sup>shifts are reported for UAKS/UFF radii.
